# Supplementary material
Source: publisher site journal article supplement (https://www.dovepress.com/article/513578)
Supplement: Supplementary file 1 [file 513578%20Revised%20%25252509Supplementary.docx]

# Supplementary material

## Thrombotic thrombocytopenic purpura and Evans syndrome: validating and exploring 20 years of routine hospital care

### Authors:

Dana Audrey Lawrie1, Dennis Lund Hansen1,2, Thomas Leineweber Kristensen3, Sarah Birgitte Ingemod Sand Carlsen4, Louise Hur Hannig5, Per Trøllund Pedersen6, Helene Bjørg Kristensen7, Mads Okkels Birk Lorenzen8, Jesper Stentoft8, Peter Buur van Kooten Niekerk8, Maren Poulsgaard Jørgensen9,10, Marianne Tang Severinsen9,10, Mikkel Helleberg Dorff4, Robert Schou Pedersen11, Andreas Glenthøj3, Henrik Frederiksen1,2

### Affiliations:

1Department of Hematology, Odense University Hospital, Odense, Denmark

2Department of Clinical Research, University of Southern Denmark, Odense, Denmark

3Department of Hematology, Rigshospitalet, Copenhagen, Denmark

4Department of Hematology, Zealand University Hospital, Roskilde, Denmark

5Division of Hematology, Department of Internal Medicine, Vejle Hospital, Vejle, Denmark

6Department of Hematology, Hospital of Southwestern Jutland, Esbjerg, Denmark

7Department of Internal Medicine, Hospital of Southern Jutland, Sønderborg, Denmark

8Department of Hematology, Aarhus University Hospital, Aarhus, Denmark

9Department of Hematology, Clinical Cancer Research Unit, Aalborg University Hospital, Aalborg, Denmark

10Department of Clinical Medicine, Aalborg University, Aalborg, Denmark

11Clinic for Blood Disease, Regionshospitalet Gødstrup, Herning, Denmark

**Table S1: Descriptive characteristics and comparisons of registered TTP and Evans syndrome patients diagnosed 2000-2019, by confirmed and rejected diagnoses**

|  |  | Original diagnosis | |
| --- | --- | --- | --- |
|  |  | **Confirmed** | **Rejected** |
| Registered TTP | | n=69 | n=80 |
|  | Age at diagnosis, median [IQR] | 49.7 [39.3 - 61.0] | 62.6 [48.3 - 71.4] |
|  | Female, % [95%CI] | 63.8 [51.3 - 75.0] | 46.3 [35.0 - 57.8] |
|  | ADAMTS13 enzyme activity investigated, % [95%CI] | 78.3 [66.7 - 87.3] | 45.2 [33.5 - 57.3] |
|  | ADAMTS13 inhibitor investigated, % [95%CI] | 79.4 [67.9 - 88.3] | 33.3 [22.7 - 45.4] |
|  | DAT investigated, % [95%CI] | 89.9 [80.2 - 95.8] | 66.7 [54.3 - 77.6] |
|  | Schistocytes investigated, % [95%CI] | ≥95.7† | 64.8 [52.5 - 75.8] |
|  | Thrombocytopenia, % [95%CI] | 100.0 [94.7 - 100.0] | ≥96.3† |
|  | Hemolysis, % [95%CI] | 100.0 [94.7 - 100.0] | 61.4 [49.0 - 72.8] |
|  | First diagnosis at hematology department, % [95%CI] | 65.2 [52.8 - 76.3] | 25.0 [16.0 - 35.9] |
|  | Death during follow-up, % [95%CI] | 26.1 [16.3 - 38.1] | 58.8 [47.2 - 69.6] |
|  |  |  |  |
| Registered Evans syndrome | | n=65 | n=45 |
|  | Age at diagnosis, median [IQR] | 68.2 [55.9 - 76.7] | 57.4 [34.6 - 72.8] |
|  | Female, % [95%CI] | 36.9 [25.3 - 49.8] | 55.6 [40.0 - 70.4] |
|  | ADAMTS13 enzyme activity investigated, % [95%CI] | 12.5 [5.6 - 23.2] | 25.6 [13.0 - 42.1] |
|  | ADAMTS13 inhibitor investigated, % [95%CI] | 6.7 [1.8 - 16.2] | 23.1 [11.1 - 39.3] |
|  | DAT investigated, % [95%CI] | ≥95.4† | 81.6 [65.7 - 92.3] |
|  | Schistocytes investigated, % [95%CI] | 50.8 [38.1 - 63.4] | 41.0 [25.6 - 57.9] |
|  | Thrombocytopenia, % [95%CI] | ≥95.4† | 84.6 [69.5 - 94.1] |
|  | Hemolysis, % [95%CI] | ≥95.4† | 53.8 [37.2 - 69.9] |
|  | First diagnosis at hematology department, % [95%CI] | 76.9 [64.8 - 86.5] | 53.3 [37.9 - 68.3] |
|  | Death during follow-up, % [95%CI] | 49.2 [36.6 - 61.9] | 51.1 [35.8 - 66.3] |

†In the interest of data protection, specific values for patient groups ≤3 and groups that can be used to identify patient groups ≤3 are censored

**Abbreviations:** 95%CI, 95% confidence interval; IQR, interquartile range; TTP, thrombotic thrombocytopenic purpura; ADAMTS13, von Willebrand factor-cleaving protease; DAT, direct antiglobulin test.
